# Supplementary material for: The Effect of Recycling on Wood-Fiber Thermoplastic Composites
Source: PubMed Central journal article supplement (PMC7463641; doi:10.3390/polym12081750), 2020-08-05
Supplement: polymers-12-01750-s001.pdf [file polymers-12-01750-s001.pdf]

Article

# The effect of recycling on wood-fiber thermoplastic composites

Lúisa Rosenstock Völtz, Irangeli Di Guisepe, Shiyu Geng, and Kristiina Oksman\*

Division of Materials Science, Department of Engineering Sciences and Mathematics, Luleå University of Technology, Luleå SE-971-87, Sweden; Luisa.voltz@ltu.se (L.R.V.); iradiyu@gmail.com (I.D.G.); shiyu.geng@ltu.se (S.G.)

\* Correspondence: kristiina.oksman@ltu.se; Tel.: +46-920-493371

## ANOVA AND TUKEY'S TEST ON FIBER ASPECT RATIO

**Table S1.** Fiber aspect ratio and Tukey's test after each recycling step.

| No of passes | L/D                 |
|--------------|---------------------|
| 0            | 22±13 <sup>A</sup>  |
| 1            | 14±6 <sup>B</sup>   |
| 3            | 11±7 <sup>B/C</sup> |
| 5            | 10±6 <sup>B/C</sup> |
| 7            | 9±7 <sup>C</sup>    |
| 9            | 8±6 <sup>C</sup>    |

Marked with the same letter within the same column are not significantly different at 5% significant level based on ANOVA and Tukey's test.

## SHEAR VISCOSITY

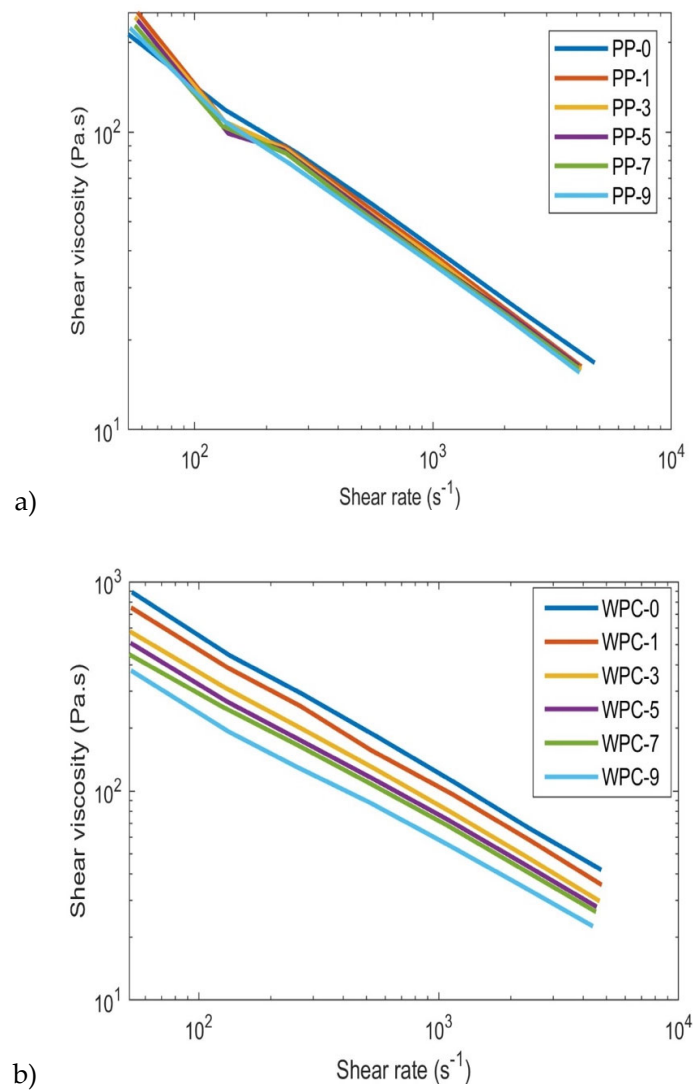

**Figure S1.** Viscosity as a function of sheat rate after each recycling step. a) PP-0, PP-1, PP-3, PP-5, PP-7 and PP-9 and b) WPC-0, WPC-1, WPC-3, WPC-5, WPC-7 and WPC-9 at 230 °C

## DIFFERENTIAL SCANNING CALORIMETRY

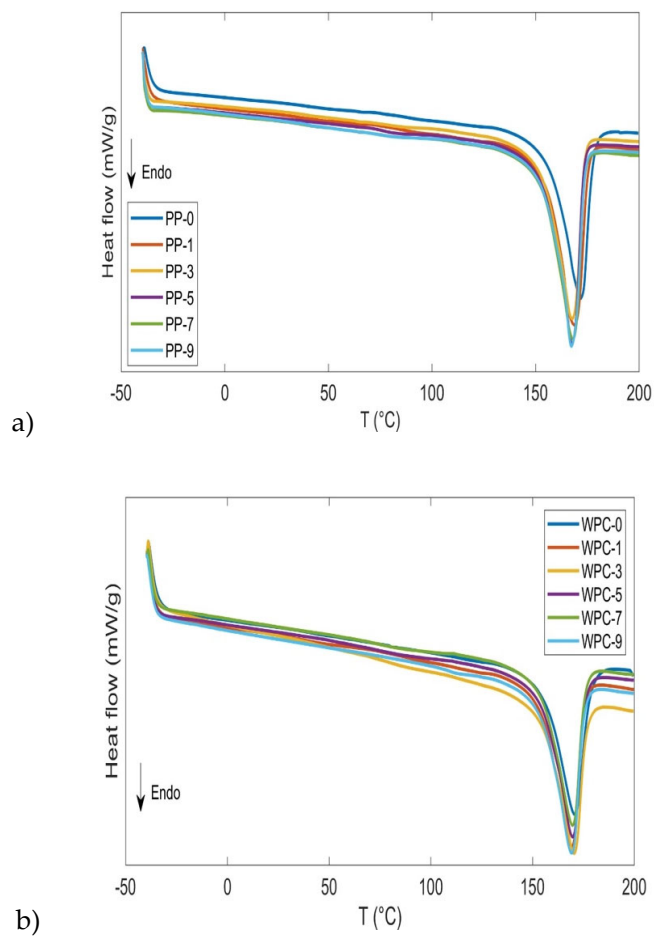

**Figure S2.** Differential scanning calorimetry (DSC) graphs for the neat PP and WPC after each recycling step. a) PP-0, PP-1, PP-3, PP-5, PP-7 and PP-9 and b) WPC-0, WPC-1, WPC-3, WPC-5, WPC-7 and WPC-9.

## THERMOGRAVIMETRIC ANALYSIS

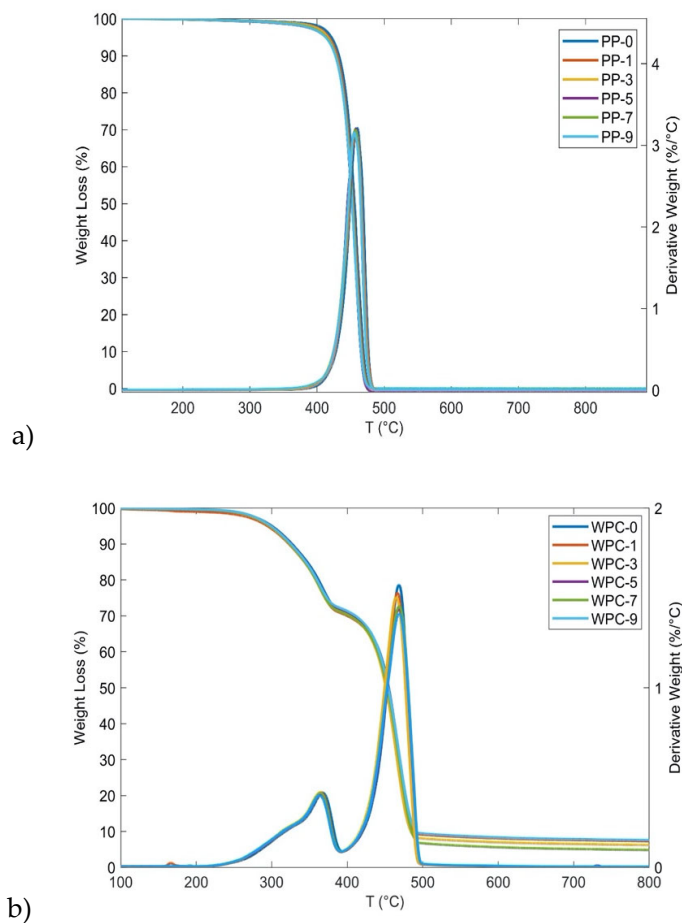

**Figure S3.** Thermal degradation (TGA/DTG graphs) for PP and WPC after each recycling step. a) PP-0, PP-1, PP-3, PP-5, PP-7 and PP-9 and b) WPC-0, WPC-1, WPC-3, WPC-5, WPC-7 and WPC-9.

SCANNING ELECTRON MICROSCOPE – FRACTURE SURFACES

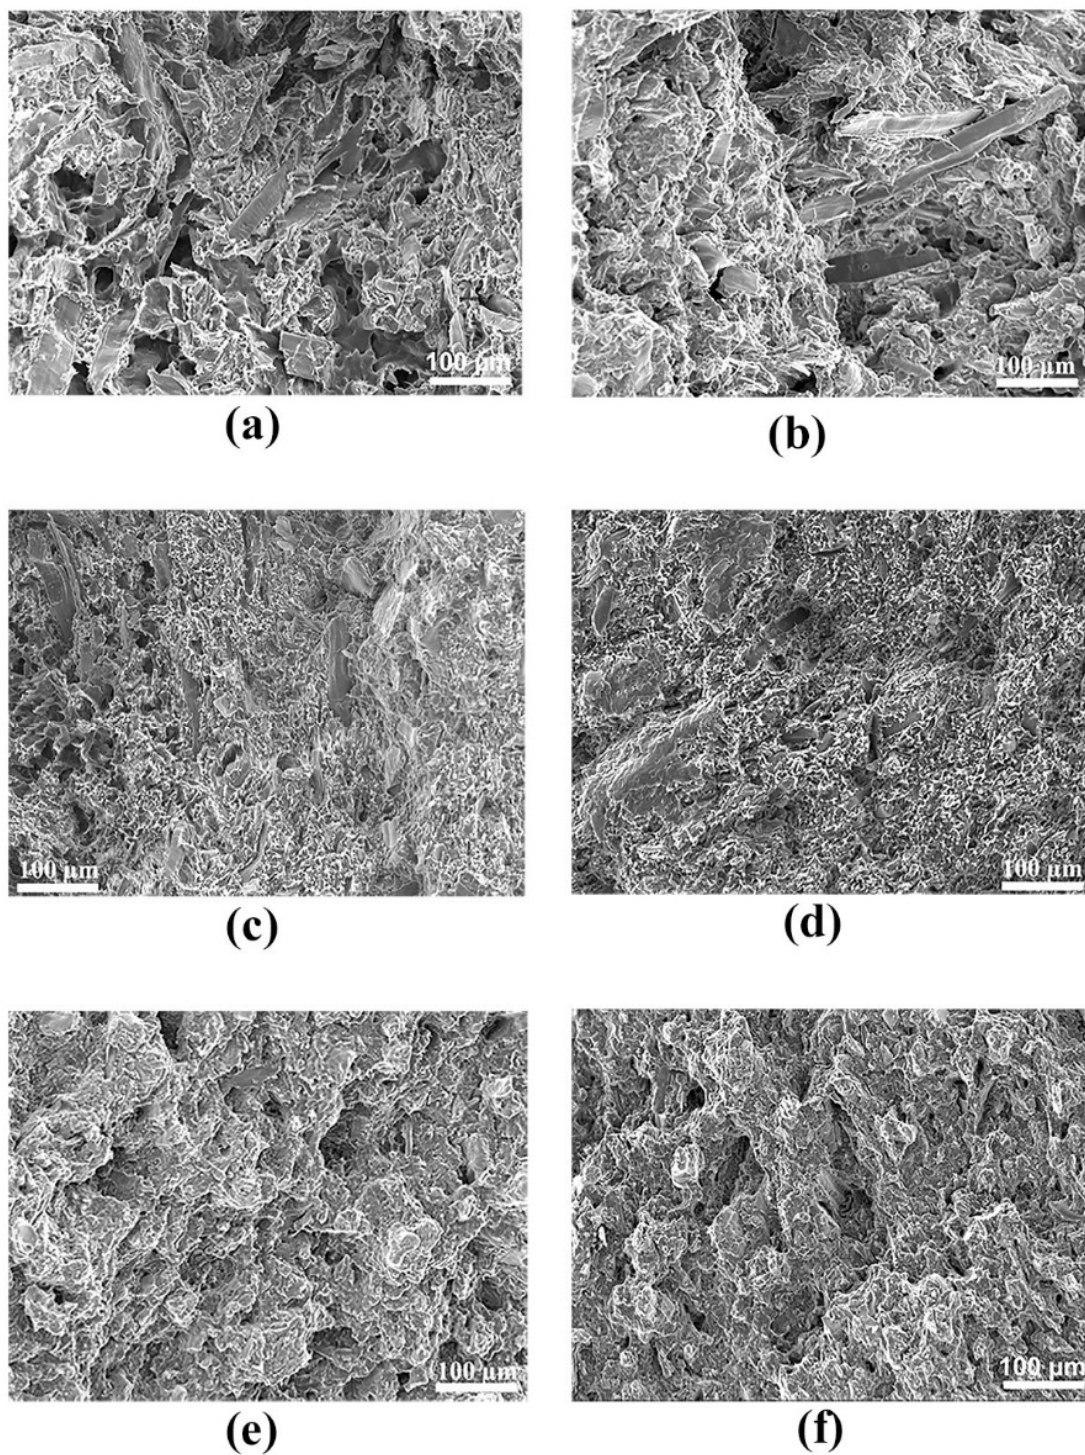

**Figure S4.** Fracture surfaces of WPC after each recycling step showing that interaction between the MAPP and WPC is improved during repeated processing. (a) WPC-0, (b) WPC-1, (c) WPC-3, (d) WPC-5, (e) WPC-7 and (f) WPC-9.
